# Supplementary material for: Sensitive electrochemical determination of rifampicin using gold nanoparticles/poly-melamine nanocomposite
Source: Royal Society of Chemistry journal article supplement (doi:10.1039/c7ra04865c), 2017-01-01
Supplement: c7ra04865c1.pdf [file c7ra04865c1.pdf]

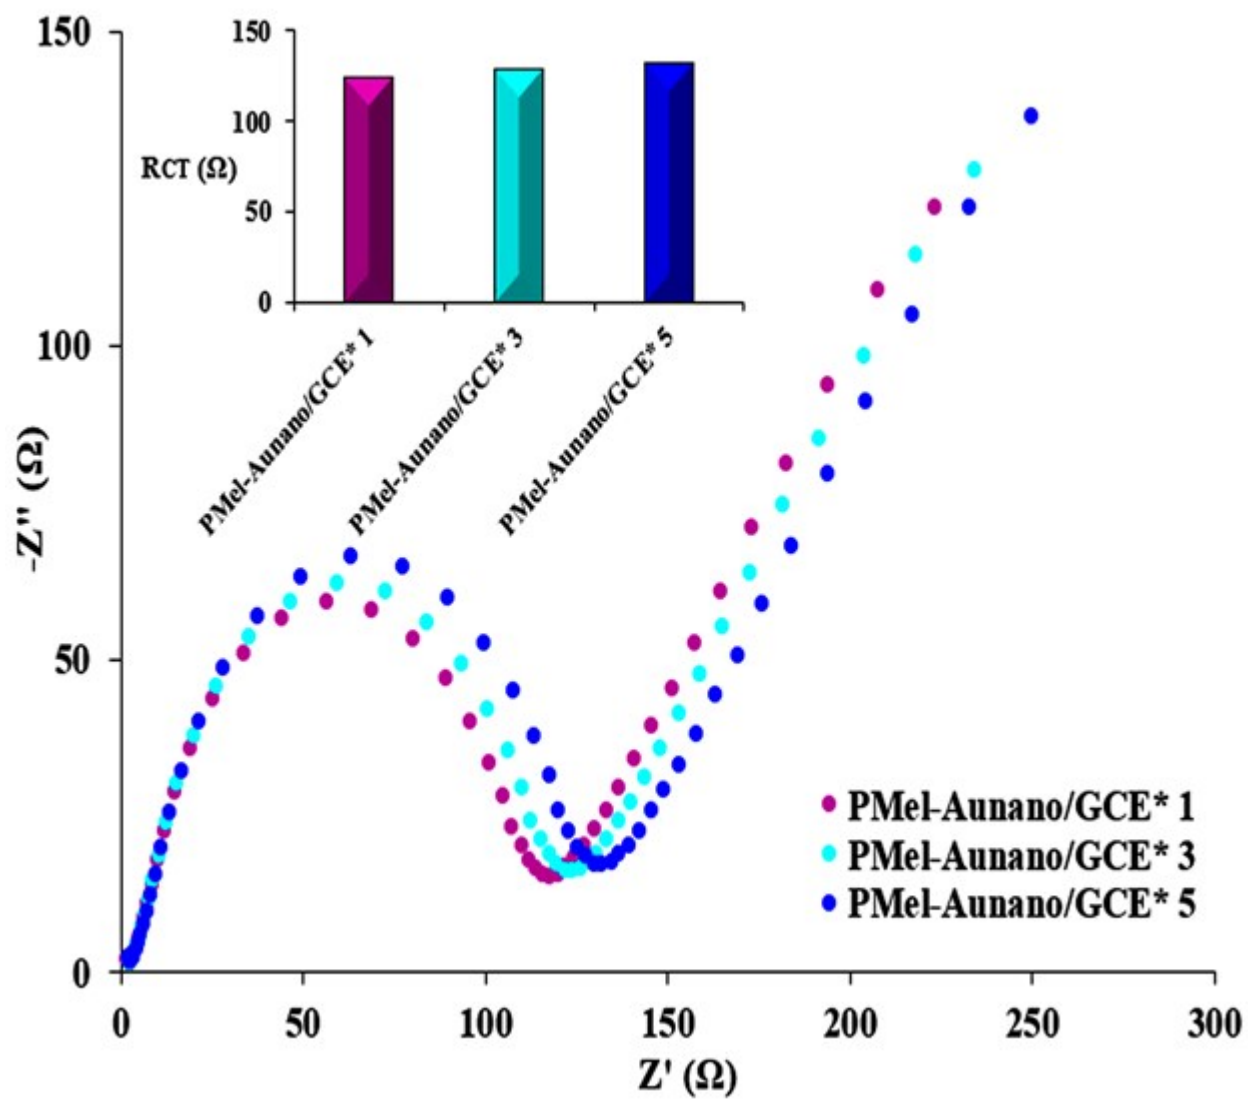

Fig S1. Reproducibility of the modified electrode in 5.0 μM RIF

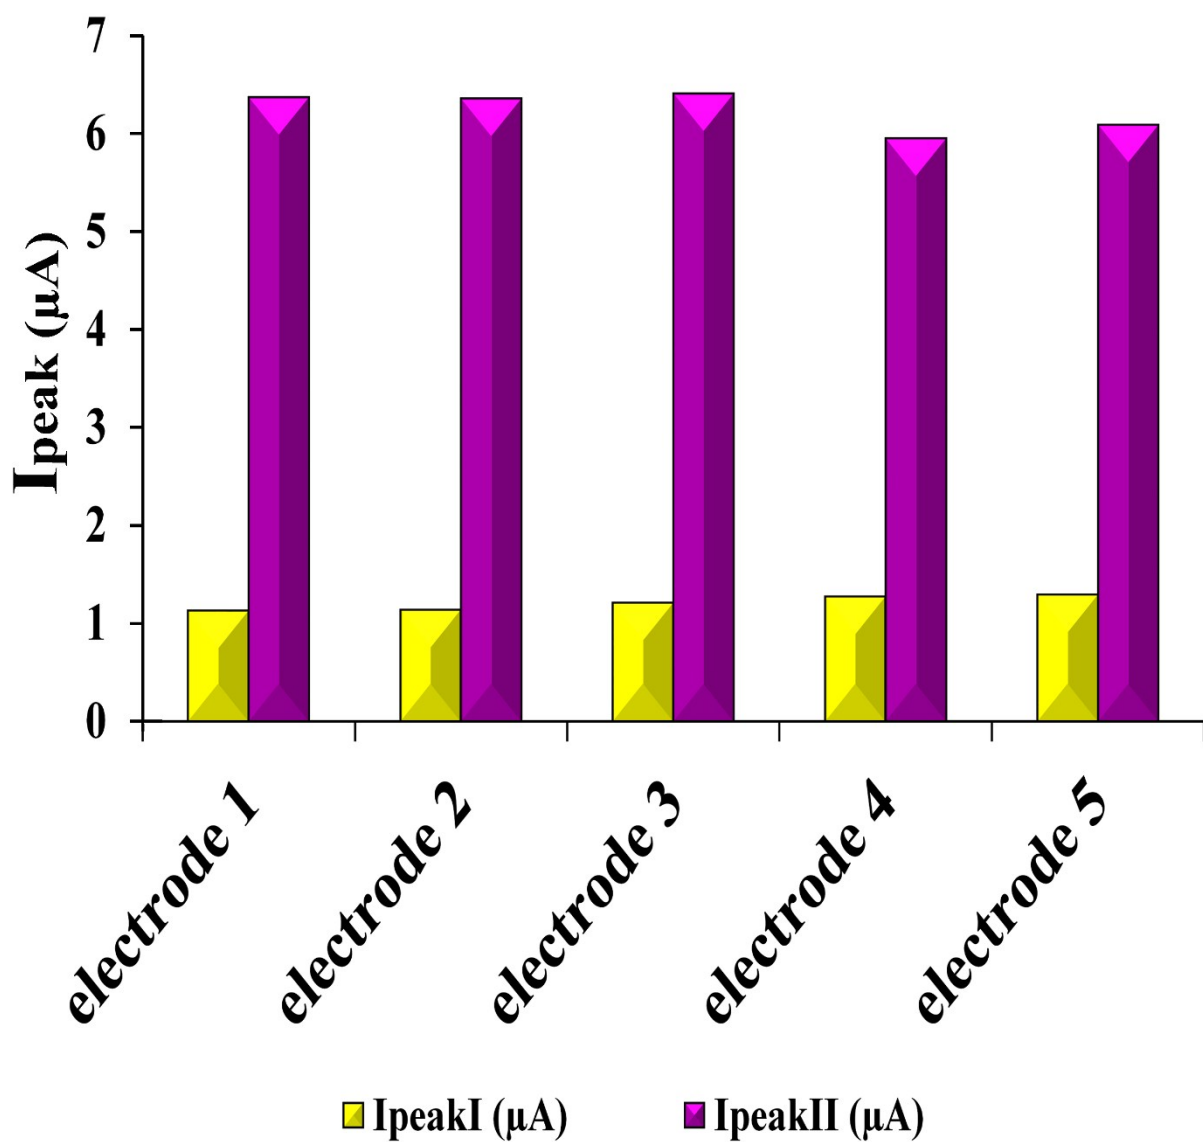

Fig S2. Reproducibility of the modified electrode in 5.0  $\mu M$  RIF
